1 Soft sweeps predominate recent positive selection in bonobos (*Pan paniscus*) and chimpanzees  
2 (*Pan troglodytes*)

3

4 Colin M. Brand<sup>1</sup>, Frances J. White<sup>1</sup>, Nelson Ting<sup>1,2</sup>, Timothy H. Webster<sup>3</sup>

5

6 <sup>1</sup>Department of Anthropology, University of Oregon, Eugene, OR

7 <sup>2</sup>Institute of Ecology and Evolution, University of Oregon, Eugene, OR

8 <sup>3</sup>Department of Anthropology, University of Utah, Salt Lake City, UT

9

10 Corresponding Author: Colin M. Brand

11

12 University of Oregon

13 Department of Anthropology

14 1218 University of Oregon

15 Eugene, OR 97403

16 cbrand2@uoregon.edu

17 **Abstract**

18           Two modes of positive selection have been recognized: 1) hard sweeps that result in the  
19 rapid fixation of a beneficial allele typically from a *de novo* mutation and 2) soft sweeps that are  
20 characterized by intermediate frequencies of at least two haplotypes that stem from standing  
21 genetic variation or recurrent *de novo* mutations. While many populations exhibit both hard and  
22 soft sweeps throughout the genome, there is increasing evidence that soft sweeps, rather than  
23 hard sweeps, are the predominant mode of adaptation in many species, including humans. Here,  
24 we use a supervised machine learning approach to assess the extent of completed hard and soft  
25 sweeps in the closest living relatives of humans: bonobos and chimpanzees (genus *Pan*). We  
26 trained convolutional neural network classifiers using simulated data and applied these classifiers  
27 to population genomic data for 71 individuals representing all five extant *Pan* lineages, of which  
28 we successfully analyzed 60 individuals from four lineages. We found that recent adaptation in  
29 *Pan* is largely the result of soft sweeps, ranging from 73.1 to 97.7% of all identified sweeps.  
30 While few hard sweeps were shared among lineages, we found that between 19 and 267 soft  
31 sweep windows were shared by at least two lineages. We also identify novel candidate genes  
32 subject to recent positive selection. This study emphasizes the importance of shifts in the  
33 physical and social environment, rather than novel mutation, in shaping recent adaptations in  
34 bonobos and chimpanzees.

35

36 **Keywords:** adaptation, convolutional neural network, diploS/HIC, selective sweep, supervised  
37 machine learning

## 38 **Introduction**

39           The identification of adaptative traits and their genetic basis is one of the central goals of  
40 evolutionary biology. Two approaches, top-down and bottom-up, have been used to accomplish  
41 this goal; the latter of which leverages population-level data to recognize the genomic signatures  
42 of positive selection (Barrett and Hoekstra 2011). At the genomic level, the process of adaptation  
43 results in a window of reduced variation that erodes over time. As these signatures do not persist,  
44 they can only be used to infer selection over a particular time scale in a population. In most  
45 species, this time frame is restricted to a few thousand generations, roughly ~ 200,000 years in  
46 humans (Oleksyk et al. 2010). The classic model for positive selection for a given locus proposes  
47 that a single, novel mutation, that confers a fitness advantage (i.e., a beneficial allele) will rapidly  
48 spread in a population and eventually reach fixation (Maynard Smith and Haigh 1974). Neutral  
49 polymorphism adjacent to the novel allele will ‘hitchhike’, resulting in a distinct pattern of  
50 reduced genomic diversity at the locus and surrounding sites. The term ‘hard sweep’ has been  
51 used to identify this pattern and process.

52           ‘Soft sweeps’ describe the presence of two or more haplotypes that occur at intermediate  
53 frequencies (Hermisson and Pennings 2005). Thus, the signature of a soft sweep is intermediate  
54 to those of neutral or ‘background’ genomic variation and the signature of a hard sweep. This  
55 pattern can result from recurrent *de novo* mutations following positive selection. Alternatively,  
56 soft sweeps can also result from positive selection on standing genetic variation where alleles  
57 were already present in a population before selection. This variation may be the result of  
58 independent mutations (multiple origin soft sweep) or when an adaptive allele arose before  
59 selection, but multiple copies have subsequently swept through the population (single origin soft  
60 sweep). Soft sweeps are often incorrectly viewed synonymously with standing genetic variation;

61 hard sweeps can emerge from standing genetic variation if a single copy of the beneficial allele  
62 was the ancestor of all beneficial alleles in a sample (Hermisson and Pennings 2017).

63 Hard and soft sweeps are locus-specific and, thus, not mutually exclusive across a  
64 genome. Unsurprisingly, soft sweeps are also much more difficult to recognize than hard sweeps  
65 because their genomic patterns are intermediate. Additionally, the identification of selective  
66 sweeps, hard or soft, is further complicated by the possibility that neutral loci linked to either soft  
67 or hard sweeps may produce a false signature similar to that of a sweep (Schrider et al. 2015;  
68 Kern and Schrider 2018).

69 With these challenges in mind, a considerable amount of work has been dedicated to both  
70 developing robust methods to identify selective sweeps and also understanding the evolutionary  
71 parameters that determine hard or soft sweeps. Mutation-limited scenarios are expected to  
72 exclusively produce hard sweeps because beneficial alleles rarely occur (Hermisson and  
73 Pennings 2017). Thus, the most important parameter for estimating the likelihood of hard vs soft  
74 sweeps is the population-scaled mutation rate:  $\theta = 4N_e\mu$ , where  $N_e$  is the effective population size  
75 and  $\mu$  is the mutation rate. However, this single parameter can vary widely depending on the  
76 advantage of the beneficial allele, the effective population size, the size of the mutational target,  
77 and the timescale for adaptation (Messer and Petrov 2013; Hermisson and Pennings 2017).  
78 Therefore, adaptation across the genome for a given population can be simultaneously mutation-  
79 limited and non-mutation-limited (B.A. Wilson et al. 2014). While it has become clear that most  
80 populations will likely exhibit a mosaic of hard and soft sweeps (Hermisson and Pennings 2017),  
81 additional data on sweep type frequencies in various species are sorely needed to better tease  
82 apart which parameters may determine each of those frequencies.

83 Both species of the *Pan* genus represent important evolutionary models due to their  
84 phylogenetic proximity to humans. *Homo* and *Pan* diverged ~ 5 to 7 Ma (Sarich and Wilson  
85 1967; Bradley 2008; Scally et al. 2012; Besenbacher et al. 2019) and the most recent estimates  
86 for the divergence of bonobos and chimpanzees range between 1 and 2 Ma (Prüfer et al. 2012; de  
87 Manuel et al. 2016). Four extant chimpanzee subspecies evolved from a chimpanzee common  
88 ancestor that split ~ 600 Ka with both subsequent lineages further splitting: one ~ 250 Ka and the  
89 other ~ 160 Ka (de Manuel et al. 2016). These two species exhibit stark differences in aspects of  
90 their morphology, physiology, behavior, and ecology (Susman 1984; Goodall 1986; Wrangham  
91 1986; Kano 1992; White 1996; Furuichi 2011; Nishida 2011; Stumpf 2011; Behringer et al.  
92 2014; Turley and Frost 2014; M.L. Wilson et al. 2014). Many of these distinguishing traits are  
93 inferred to have occurred shortly after divergence, while much less is known about recent  
94 evolutionary processes in these lineages.

95 Understanding recent positive selection in *Pan* is intriguing because of the dynamic  
96 physical and social environments in which they evolved. Climatic variation across Africa is well-  
97 documented for the Pleistocene and has been proposed to drive the evolution of early *Homo*  
98 (Potts 1998; Antón et al. 2014), and such variation probably impacted other taxa throughout the  
99 Pleistocene, including the genus *Pan*. Chimpanzee populations living in more stable  
100 environments that were closer to Pleistocene refugia were recently described to exhibit less  
101 behavioral diversity than chimpanzees living in more seasonal habitats that are more distant to  
102 forest refugia (Kalan et al. 2020). While the formation of these refugia may have resulted in  
103 periods of habitat stability for some bonobo and chimpanzee populations during glacial periods  
104 (Takemoto et al. 2017; Barratt et al. 2020), climatic fluctuations throughout the Pleistocene  
105 likely affected both the physical environment—via changes in habitat structure and type—and

106 the social environment—via changes in the frequency of dispersal and intergroup encounters.  
107 Further, evidence of admixture within extant and between extant and extinct members of the *Pan*  
108 genus adds even more variation to the social environments in which these apes evolved (Hey  
109 2010; Wegmann and Excoffier 2010; de Manuel et al. 2016; Kuhlwilm et al. 2019). A dynamic  
110 environment may result in selection for multiple existing alleles, resulting in a greater frequency  
111 of soft sweeps than in a more stable environment where one would expect a greater frequency of  
112 hard sweeps.

113 In this study, we apply a recently developed supervised machine-learning approach to  
114 population-level genomic data for bonobos (*Pan paniscus*) and chimpanzees (*Pan troglodytes*) to  
115 assess the extent of different completed sweep types in these species. While a few studies have  
116 examined recent positive selection in bonobos and chimpanzees (e.g., Cagan et al. 2016; Han et  
117 al. 2019; Schmidt et al. 2019; Kovalaskas et al. 2020; Nye et al. 2020), the role of hard and soft  
118 sweeps in shaping their adaptations is currently unknown. We sought to categorize genomic  
119 regions as subject to recent hard or soft sweeps, as linked to recent hard or soft selective sweeps,  
120 or as evolving neutrally. Data from simulations have predicted that hard sweeps would be  
121 common in humans because of our overall low mutation rate (Hermisson and Pennings 2017).  
122 Under this “mutation limitation hypothesis” and given the similarity in mutation rate between  
123 *Homo* and *Pan*, one could predict that bonobos and chimpanzees should also exhibit a high  
124 degree of hard sweeps. However, hard sweeps have been thought and observed to be quite rare in  
125 recent human evolution (Hernandez et al. 2011; Schrider and Kern 2017), although this  
126 perspective is debated (Jensen 2014; Harris et al. 2018). This could be explained by several non-  
127 mutually exclusive alternatives including demographic effects. Larger populations can have  
128 more standing variation for selection to act on (Hermisson and Pennings 2005) which may result

129 in more soft sweeps, whereas bottlenecks can result in drift and thus potentially more hard  
130 sweeps if intermediate frequency haplotypes are lost (B.A. Wilson et al. 2014). For example,  
131 humans have experienced recent demographic changes (e.g., Schiffels and Durbin 2014),  
132 including a bottleneck upon leaving Africa (e.g., Henn et al. 2012). Indeed, Schrider and Kern  
133 (2017) found that hard sweeps were more frequent in non-African than African populations.  
134 Chimpanzees and bonobos have also experienced recent demographic changes, including in  
135 effective population size, within the time frame ( $< 200$  Ka) for selective sweeps, based on PSMC  
136 analyses (Prado-Martinez et al. 2013; de Manuel et al. 2016). Three of the five lineages appear to  
137 have declined, whereas the other two have increased and then decreased. Under such changes in  
138 population size, the strength of selection plays a strong role in the likelihood of soft sweeps  
139 (B.A. Wilson et al. 2014). We therefore predicted that we would observe a higher frequency of  
140 soft sweeps in *Pan*, but that lineage-specific population histories might affect the degree to  
141 which soft sweeps dominate.

142

## 143 **Methods**

### 144 *Genomic Data*

145 We retrieved raw short read data on bonobos and all four chimpanzee subspecies from  
146 the Great Ape Genome Project (GAGP) (Prado-Martinez et al. 2013). This dataset contained  
147 high coverage genomes (Figures S1, S2) from 13 bonobos (*P. paniscus*), 18 central chimpanzees  
148 (*P. troglodytes troglodytes*), 19 eastern chimpanzees (*P. t. schweinfurthii*), 10 Nigeria-Cameroon  
149 chimpanzees (*P. t. ellioti*), and 11 western chimpanzees (*P. t. verus*) (File S1).

150

### 151 *Read Mapping and Variant Calling*

152 Initial quality assessments in fastqc (Andrews 2010) and multiqc (Ewels et al. 2016)  
153 indicated a number of quality issues, including failed runs, problematic tiles, and substantial  
154 variation in base quality. We removed adapters and trimmed all reads for quality with BBduk  
155 (<https://sourceforge.net/projects/bbmap/>). For trimming, we used the parameters “ktrim=r k=21  
156 mink=11 hdist=2 qtrim=rl trimq=15 minlen=50 maq=20” for all reads and added “tpo and tpe”  
157 for paired reads.

158 We used XYalign (Webster et al. 2019) to create versions of the chimpanzee reference  
159 genome, panTro6 (Kronenberg et al. 2018), for male- and female-specific mapping. Specifically,  
160 the version of the reference for female mapping has the Y chromosome completely masked, as  
161 its presence can lead to mismapping (Webster et al. 2019). We then mapped reads with BWA  
162 MEM (Li, unpublished data) and used SAMtools (Li et al. 2009) to fix mate pairs, sort BAM  
163 files, merge BAM files per individual, and index BAM files. We use Picard (Broad Institute  
164 2018) to mark duplicates with default parameters, before calculating BAM statistics with  
165 SAMtools. We next measured depth of coverage with mosdepth (Pedersen and Quinlan 2018),  
166 removing duplicates and reads with a mapping quality less than 30 for calculations.  
167 Visualizations for coverage and demography (see Generation of Simulated Chromosomes below)  
168 were created in R, version 3.5.2 (R Core Team 2020), using ‘ggplot2’ (Wickham 2016).

169 We used GATK4 (Poplin et al. 2018) for joint variant calling across all samples. We used  
170 default settings for all steps—HaplotypeCaller, CombineGVCFs, and GenotypeGVCFs—with  
171 three exceptions. First, we turned off physical phasing for computational efficiency and  
172 downstream VCF compatibility with filtering tools. Second, because multiple samples in this  
173 dataset suffer from contamination from other samples both within and across taxa (Prado-  
174 Martinez et al. 2013), we employed a contamination filter to randomly remove 10% of reads



175 during variant calling. This should have the effect of reducing confidence in contaminant alleles.  
176 Finally, we output non-variant sites to allow equivalent filtering of all sites in the genome and  
177 more accurate assessments of callability.

178 The above quality control, assembly, and variant calling steps are all contained in an  
179 automated Snakemake (Köster and Rahmann 2012) available on Github  
180 ([https://github.com/thw17/Pan\\_reassembly](https://github.com/thw17/Pan_reassembly)). The repository also contains a Conda environment  
181 with all software versions and origins, most of which are available through Bioconda (Grüning et  
182 al. 2018).

183

#### 184 *Variant Filtration and Genome Accessibility*

185 We considered only autosomes for this analysis as the X and Y chromosome violate  
186 many of the assumptions for the following methods (Webster and Wilson Sayres 2016). We also  
187 excluded unlocalized scaffolds (N = 4), unplaced contigs (N = 4,316), and the mitochondrial  
188 genome from any downstream analyses. Additional filtration steps were completed using  
189 bcftools (Li 2011); command line inputs are provided in parentheses. Given our focus on  
190 selective sweeps, we only included single nucleotide variants (SNVs) (“-v snps”) that were  
191 biallelic (“-m2 -M2”). On a per sample basis within each site, we marked genotypes where  
192 sample read depth was less than 10 and/or genotype quality was less than 30 as uncalled (“-S . -i  
193 FMT/DP  $\geq$  10 && FMT/GT  $\geq$  30”). To ensure that missing data did not bias our results, we  
194 further excluded any sites where less than ~ 80% of individuals (N = 56) were confidently  
195 genotyped (“AN  $\geq$  112”). We also removed any positions that were monomorphic for either the  
196 reference or alternate allele (“AC > 0 && AC  $\neq$  AN”). These filtrations steps yielded 41,869,892  
197 SNVs for our downstream analyses (Table S1).

198 We considered sites in our sample with low to no coverage to be ‘inaccessible’ in the  
199 reference genome. Using the output of mosdepth (see Read Mapping and Variant Calling above),  
200 we identified and filtered sites exhibiting low coverage as defined above. We used the  
201 ‘maskfasta’ function in bedtools (Quinlan and Hall 2010) to mark these sites (N) in the pantro6  
202 FASTA, featuring only the autosomes, for use in downstream analyses. This resulted in 86.3% of  
203 the assembled autosomes as accessible (File S2).

204

### 205 *Generation of Simulated Chromosomes*

206 We used the software ‘discoal’ to generate simulated chromosomes on which we trained  
207 a classifier per lineage (Kern and Schrider 2016). We generated a matching number of simulated  
208 haploid chromosomes for the sample size of each *Pan* lineage (i.e., 26 chromosomes for 13 *P.*  
209 *paniscus*, 20 chromosomes for 10 *P. t. ellioti*, etc.). Simulated chromosomes were set to 1.1 Mb  
210 in length and divided into 0.1 Mb subwindows for a total of 11 subwindows. These simulations  
211 included a population-scaled mutation rate ( $4N\mu L$ ), where  $N$  is the effective population size,  $\mu$  is  
212 the per base pair per generation mutation rate, and  $L$  is the length of the simulated chromosome.  
213 We used the median of the previously reported effective population size range per lineage  
214 (Prado-Martinez et al. 2013). As estimates of genome-wide mutation rates vary considerably and  
215 are complicated in that mutation rates vary across individual genomes, we based our parameter  
216 on a mutation rate of  $1.6 \times 10^{-8}$ , which falls between estimates from genome-wide data and  
217 phylogenetic estimates (Narasimhan et al. 2017). We introduced some variation in this rate by  
218 setting a lower and upper-bound to  $1.5$  and  $1.7 \times 10^{-8}$  and sampled a new mutation rate per  
219 simulation drawing from this uniform prior. All simulations also included a population-scaled  
220 recombination rate ( $4NrL$ ), where  $r$  is the recombination rate per base pair per generation, again

221 calculated from the median effective population size for each lineage from Prado-Martinez et al.  
222 (2013) and a recombination rate drawn from a uniform prior of  $1.1 - 1.3 \times 10^{-8}$ , based on the  
223 mean genome-wide rate ( $1.2 \times 10^{-8}$ ) reported for bonobos, chimpanzees, and gorillas (Stevison et  
224 al. 2015). Recent results from a different selective sweep classifier, Trendsetter, suggest that  
225 including a range of recombination rates is important to reducing misclassification (Mughal and  
226 DeGiorgio 2019). We note that while some of the estimated recombination rates in bonobos and  
227 chimpanzees are beyond the uniform distribution used in our simulations, many of these values  
228 are the high rates present in the telomeres, regions that generally exhibit lower or no coverage  
229 and thus will be largely if not entirely masked from this analysis (see Variant Filtration and  
230 Genome Accessibility above). We also included a demographic string reflecting approximate  
231 changes in population size for each lineage between  $\sim 0.05$  and 2 Ma. Changes in population size  
232 were set in units of  $4N_0$  generations,  $N_0$  was set to the approximate median effective population  
233 size from (Prado-Martinez et al. 2013) and we used a generation time of 25 years (Langergraber  
234 et al. 2012). Population size changes for this time period were drawn from a previous PSMC  
235 analysis (de Manuel et al. 2016) (Figure S3). While this is only one study from which to draw  
236 demographic information and reconstructions of *Pan* demography vary widely across studies, the  
237 downstream program used to classify genomic windows, diploS/HIC, is robust to demographic  
238 misspecification (Kern and Schrider 2018). We generated  $2 \times 10^3$  simulations using these  
239 parameters as a set of simulations under neutral evolution per lineage.

240 Hard and soft selective sweeps were simulated with all of the aforementioned parameters  
241 and using a uniform prior of population-scaled selection coefficients ( $\alpha = 2Ns$ ) derived from each  
242 lineage's median effective population size (Prado-Martinez et al. 2013) and moderately weak to  
243 moderately strong selection coefficients between 0.02 and 0.05. Sweeps also included a

244 parameter ( $\tau$ ) for the time to fixation of the beneficial allele over a uniform range in units of  $4N$   
245 generations. This value ranged from 0 to 0.001 for all lineages. Linked-hard and linked-soft  
246 sweeps were generated by placing the selected site at the center of each of the 10 subwindows  
247 flanking the center ( $6^{\text{th}}$ ) subwindow. Additionally, we included a uniform prior on the frequency  
248 at which a mutation is segregating at the time it becomes beneficial for soft and linked-soft  
249 sweeps, setting this range from 0 to 0.2. We generated  $1 \times 10^3$  simulations per subwindow for  
250 linked-hard and linked-soft sweeps ( $N = 10$ ) and  $2 \times 10^3$  simulations for hard and soft sweeps.  
251 This resulted in a total of  $2 \times 10^3$  hard,  $1 \times 10^4$  hard-linked,  $2 \times 10^3$  soft, and  $1 \times 10^4$  soft-linked  
252 simulated sweeps. Parameters for these simulations are presented in File S3.

253

#### 254 *Calculation of Simulation Feature Vectors and Classifier Training*

255 We calculated feature vectors from these simulated chromosomes using the ‘fvecSim’  
256 function in the program diploS/HIC (Kern and Schrider 2018). Briefly, diploS/HIC calculates 12  
257 summary statistics for all 11 subwindows:  $\pi$ , Watterson’s  $\theta$ , Tajima’s  $D$ , the variance, skew, and  
258 kurtosis of genotype distance ( $g_{kl}$ ), the number of multilocus genotypes,  $J_1$ ,  $J_{12}$ ,  $J_2/J_1$ , unphased  
259  $Z_{ns}$ , and the maximum value of unphased  $\omega$ . Collectively, these summary statistics capture  
260 information about the site frequency spectrum (SFS), haplotype structure, and linkage  
261 disequilibrium (LD). diploS/HIC uses a convolutional neural network (CNN) to capture essential  
262 aspects of a feature (the feature vector) by sliding a receptive field over the image to compute dot  
263 product between the original filter and the convolutional filter. In diploS/HIC, the CNN uses  
264 three branches of a CNN, of which each has two dimensional convolutional layers with ReLU  
265 activations followed by max pooling. This is followed by a dropout layer to control for model  
266 overfitting. Outputs from all three units are fed into two fully connected dense layers, which also

267 use dropout layers, before arriving at a softmax activation that outputs the probability for each  
268 categorical class (hard, hard-linked, neutral, soft-linked, or soft). Complete details for this  
269 procedure can be found in Kern and Schrider (2018).

270         When calculating feature vectors for the simulated chromosomes, we used the optional  
271 arguments for the ‘fvecSim’ function to mask each simulation with 110,000 bp segment  
272 randomly drawn from our masked FASTA where  $> 0.25$  of SNVs in a subwindow were  
273 accessible (i.e., not marked by Ns). This enabled us to train our classifiers on simulated data  
274 featuring the same patterns of inaccessible genomic regions that the classifier would encounter in  
275 the empirical data.

276         We created a balanced set with equal representation ( $2 \times 10^3$ ) of all five classes via  
277 sampling without replacement in which to train the classifier using diploS/HIC’s  
278 ‘makeTrainingSets’ function. These were divided into 8,000 training examples, 1,000 validation  
279 examples, and 1,000 testing examples to test the accuracy of the classifier via the ‘train’ function  
280 in diploS/HIC. We built ten classifiers per lineage and selected the one with the highest accuracy  
281 to apply to the empirical data (File S4).

282         A second, independent set of simulated chromosomes was generated per lineage using  
283 the same parameters. We then calculated feature vectors and created another balanced training  
284 set with  $2 \times 10^3$  chromosomes per class (hard, linked-hard, neutral, linked-soft, and soft). We  
285 used diploS/HIC’s ‘predict’ function by applying each trained classifier to all five classes  
286 separately per lineage. In other words, we ran each classifier on 2000 simulated hard sweeps,  
287 2000 simulated linked-hard sweeps, 2000 simulated neutral regions, 2000 simulated linked-soft  
288 sweeps, and 2000 simulated soft sweeps and for each lineage. We used a binary classification  
289 scheme, where the identification of a sweep (hard or soft) was considered to be positive and

290 linked or neutral regions were negative, to assess the true positive rate, false positive rate, and  
291 obtain a second estimate of accuracy for each trained classifier (Tables S2 - S5). We also  
292 calculated class-specific accuracy, by summing the number of instances per lineage where the  
293 predicted class matched the simulated class divided by the total ( $1 \times 10^4$ ) (Tables S2 - S5).

294

### 295 *Empirical Data Feature Vectors and Prediction*

296 Upon achieving  $> 0.8$  accuracy, each trained classifier was applied to its respective *Pan*  
297 lineage. Each autosome was analyzed separately and feature vectors calculated using  
298 diploS/HIC's 'fvecVcf' function. We supplied this function with the masked FASTA for that  
299 chromosome and discarded windows where any subwindow had  $< 0.25$  unmasked sites  
300 following Schrider and Kern (2017) (File S5). This step reduces the potential effect of the  
301 number of SNVs in a given window on sweep classification. Finally, the trained classifier was  
302 applied to the feature vector files using the 'predict' function.

303

### 304 *Sweep Identification, Potential Target Genes, and Gene Ontology*

305 As diploS/HIC outputs the probability for each sweep class, we first report the class  
306 inferred to be the most likely. However, as the difference between the most likely class and the  
307 next most likely may be small, we further report windows where the sweep class probability is  $>$   
308  $0.5$ ,  $> 0.75$ , and  $> 0.9$  (File S6). We also examined our data for spatial patterns. Windows  
309 classified as immediately abutting other windows with the same sweep type for hard and soft  
310 sweeps were considered to be a single sweep. Unique sweep windows and those shared between  
311 two or more lineages were visualized using UpSet plots (Lex et al. 2014) in R (R Core Team  
312 2020).

313           We examined what genes lie in the windows identified as being subject to a recent  
314 selective sweep by extracting the genomic coordinates of all autosomal coding regions for the  
315 longest transcript per gene (N = 20,119 genes) in the panTro6 genome via the panTro6 gff  
316 (retrieved from: [https://www.ncbi.nlm.nih.gov/genome/202?genome\\_assembly\\_id=380228](https://www.ncbi.nlm.nih.gov/genome/202?genome_assembly_id=380228)). We  
317 used the bedtools ‘intersect’ function (Quinlan and Hall 2010) to identify overlap between  
318 coding regions and candidate sweep windows after converting both CDS and sweep window  
319 coordinates to 0-start, half-open format. As some coding sequences may have been masked (see  
320 Variant Filtration and Genome Accessibility above), we extracted FASTAs for each coding  
321 sequence using bedtools ‘getfasta’ function (Quinlan and Hall 2010) and used a custom R script  
322 to calculate the percent of each gene that was masked. Overall, 66.2% of all coding sequence  
323 was unmasked. We excluded listing genes for candidate sweep regions if > 50% of the total  
324 coding sequence per gene was masked. Thus, we considered 13,228 genes as potential targets for  
325 selective sweeps (File S7).

326           We investigated the enrichment of particular pathways by performing a gene ontology  
327 analysis using the Functional Annotation Tool in DAVID (Huang et al. 2008; Huang et al. 2009).  
328 We used the custom background described above (genes whose total coding sequence was >  
329 50% unmasked) rather than all pantro6 genes to ensure our analysis was not underpowered.  
330 DAVID does not allow for official gene symbols to be used in a background list, so we  
331 converted gene symbols to Entrez gene IDs. As not all gene symbols have a corresponding  
332 Entrez gene ID, we removed genes for which there was no Entrez gene ID (N = 98 in  
333 background list). We collated genes for both hard and soft sweeps into a single input per lineage.  
334 We evaluated statistical significance for biological process gene ontology terms via p-values  
335 adjusted using the Benjamini-Hochberg method (Benjamini and Hochberg 1995).

336 Scripts for all data analyses are available on Github  
337 ([https://github.com/brandcm/Pan\\_Selective\\_Sweeps](https://github.com/brandcm/Pan_Selective_Sweeps)).

338

## 339 **Results**

340 We generated four classifiers that reached an acceptable level of accuracy for bonobos  
341 (*P. paniscus*), central chimpanzees (*P. t. troglodytes*), eastern chimpanzees (*P. t. schweinfurthii*),  
342 and Nigeria-Cameroon (*P. t. ellioti*) chimpanzees. These classifiers ranged in accuracy from  
343 85.6% (Nigeria-Cameroonian chimpanzees) to 93.9% (central chimpanzees) (File S4). We could  
344 not produce a sufficiently accurate classifier using realistic parameters for western chimpanzees  
345 (*P. t. verus*); therefore, they were excluded from downstream analyses. Our trained classifiers  
346 had considerable statistical power (1 - false positives) ranging from 96.6 to 99.2% and a low  
347 false positive rate (false positives / false positives + true negatives) that ranged from 1.4 to 4.3%  
348 across all four classifiers (Tables S2 - S5). When considered separately—i.e., true positives only  
349 included one sweep type (hard or soft) rather than both—we had greater power to detect hard  
350 sweeps than soft sweeps, averaging 99% and 96.9% across lineages, respectively (Tables S2 -  
351 S5). Accuracy (true positives + true negatives / total) for identifying sweep regions vs non-sweep  
352 regions ranged from 94.1 to 98.3% while a second estimate (in addition to the first accuracy  
353 estimate that resulted from the construction of the classifiers) of class-specific accuracy ranged  
354 from 81.6 to 92.1% (Tables S2 - S5).

355 We classified ~ 91.6% of the assembled autosomes in each lineage (Table 1, File S8),  
356 even after masking for inaccessible regions and excluding windows with few SNVs. We found  
357 that soft sweeps were abundant in all four lineages, accounting for > 73% of all individual  
358 sweeps, whereas hard sweeps were relatively rare (Table 1, File S8). This pattern held true even



359 when more stringent posterior probabilities were applied to consider a region a sweep and at  
360 least 30% of hard sweep windows and 76% of soft sweep windows were called with 50% or  
361 greater posterior probability (File S6). Genomic regions linked to sweeps were also quite  
362 pervasive in all four lineages (Table 1); particularly among eastern chimpanzees, where roughly  
363 86% of the genome was classified as linked to selective sweeps.

364 We examined overlap in windows classified as either a hard or soft sweep across  
365 lineages, which may reflect either ancestral or parallel adaptation. Most hard sweep windows  
366 were unique to each lineage; however, we did find some shared windows across lineages (Figure  
367 1). Central and Nigeria chimpanzees shared the highest number of sweep windows ( $N = 33$ ) but  
368 when weighted by the total possible number of windows, the highest overlap for hard sweeps  
369 was between eastern and Nigeria chimpanzees ( $7/32$  or  $\sim 0.21$ ). No hard sweeps windows were  
370 shared across all lineages. Like hard sweeps, most soft sweep windows were also unique to each  
371 lineage (Figure 2). Among pairs of lineages there was remarkable consistency in the number of  
372 shared windows ( $N = 111-147$ ), even when the total possible number of shared windows is  
373 considered. One exception is eastern and central chimpanzees who shared nearly twice the  
374 number of soft sweep windows ( $N = 267$ ). The highest number of shared soft sweep windows  
375 between three lineages occurred in the three chimpanzee subspecies ( $N = 80$ ). Only 19 windows  
376 were shared across all four lineages.

377 After excluding genes that were  $> 50\%$  masked, we identified 1,671 candidate genes in  
378 bonobo hard and soft sweeps, 1,761 genes in central chimpanzee sweeps, 1,372 genes in eastern  
379 chimpanzee sweeps, and 1,844 genes in Nigeria-Cameroonian chimpanzee sweeps (File S9).  
380 After correcting for multiple testing, across all lineages, we identified only two significantly

381 enriched pathways in central chimpanzees: nervous system development and central nervous  
382 system development (File S10).

383

## 384 **Discussion**

385 Our study contributes to the emerging picture of recent evolution in *Pan* and adaptation  
386 more broadly. Contrary to the predictions of a mutation-limitation hypothesis, yet concordant  
387 with recent results for humans (e.g., Hernandez et al. 2011; Schrider and Kern 2017) and flies  
388 (Garud et al. 2015), we find soft sweeps to overwhelmingly predominate regions of the genome  
389 experiencing selective sweeps in both bonobos and the three chimpanzee subspecies we could  
390 analyze. These results confirm the prediction from Schmidt et al. (2019) who speculated that soft  
391 sweeps played a major role in the evolution of eastern and central chimpanzees. Those authors  
392 also posit that hard sweeps should be more frequent in western chimpanzees relative to other  
393 subspecies because of their low effective population size. While western chimpanzees are  
394 estimated to have the lowest effective population size, it is estimated to be only slightly lower  
395 than that of bonobos for which we found a high number (95.1%) of soft sweeps (e.g., Prado-  
396 Martinez et al. 2013; de Manuel et al. 2016). It is curious that Nigeria-Cameroon chimpanzees  
397 exhibit the most hard sweeps in this analysis. While this could be the result of a multitude of  
398 factors, it is particularly curious because this lineage has experienced a rather stable effective  
399 population size in recent evolutionary time as estimated by PSMC (Prado-Martinez et al. 2013;  
400 de Manuel et al. 2016), whereas a scenario with dramatic population decline would be expected  
401 to “harden” soft sweeps as haplotypes are stochastically lost, resulting in more hard sweeps  
402 (B.A. Wilson et al. 2014).

403           Our analysis of shared hard and soft sweeps found that most sweeps of both types were  
404 unique to each lineage. However, there was a high number of hard sweep windows shared  
405 between central and Nigeria-Cameroon chimpanzees as well as between eastern and Nigeria-  
406 Cameroon chimpanzees when the total possible number of shared sweeps was considered.  
407 Further, there were nearly twice the number of shared soft sweep windows shared between  
408 eastern and central chimpanzees. These results are similar to other recent findings (Nye et al.  
409 2020). It is impossible to discern whether or not the overlap in hard sweeps between central and  
410 Nigeria-Cameroon chimpanzees and the overlap in soft sweeps for eastern and central  
411 chimpanzees is the result of shared ancestry and/or similar environmental conditions because  
412 both pairs of lineages share a geographic boundary: the Ubangi river for eastern and central  
413 chimpanzees and Sanaga river for central and Nigeria-Cameroon chimpanzees. The overlap in  
414 hard sweeps between eastern and Nigeria-Cameroon chimpanzees is more puzzling because they  
415 are not sister taxa and share a common ancestor ~ 600 Ka. Therefore, parallel adaptation via  
416 similar physical and/or social environments may serve as a more likely hypothesis. While the  
417 lowest in overall frequency, we also identified a number of soft sweep windows that were shared  
418 across three lineages as well as 19 windows that occurred in all four. Future work should further  
419 investigate these shared sweep windows.

420           As mentioned above, soft sweeps are not exclusively the result of selection on standing  
421 genetic variation (Pennings and Hermisson 2006a; Pennings and Hermisson 2006b). However,  
422 given the mutation rates estimated for bonobos and chimpanzees, it appears unlikely that  
423 recurrent *de novo* mutations explain the majority of these soft sweeps. We did not explicitly  
424 model for different types of soft sweeps in our analysis. However, while soft sweeps from  
425 standing genetic variation and *de novo* mutations may exhibit similar genomic signatures, the

426 hypothesis that these processes result in similar genomic signatures must be tested before any  
427 additional conclusions are drawn. Hartfield and Bataillon (2020) recently suggested differences  
428 in diversity (as measured by  $\pi$ ) at the selected locus may be used to differentiate soft sweep  
429 types, although this may be more difficult to accomplish in outcrossing species. Nonetheless, our  
430 results reveal a major role of standing genetic variation, and thus changes in the physical and  
431 social environment, in driving recent adaptations in *Pan*.

432         A few recent studies have considered the impact of effective population size on adaptive  
433 evolution in the great apes (Cagan et al. 2016; Nam et al. 2017). Theory predicts that the rate of  
434 adaptive evolution should be positively correlated with effective population size when  $N_e s$  is  $\gg$   
435 1 (Gossmann et al. 2012). Both Cagan et al. (2016) and Nam et al. (2017) found a positive  
436 association between effective population size and the rate of adaptive evolution, measured by  
437 proportion of adaptive substitutions and the number of selective sweeps, respectively. However,  
438 we observed no clear linear relationship between the number of sweeps (hard, soft, or both)  
439 estimated from this analysis and the estimated effective population sizes for these four lineages  
440 (see File S3 for population sizes). This descriptive result should be considered cautiously  
441 because of the limited number of lineages analyzed here and the potential confounding effect of  
442 phylogeny. It is possible that this relationship may not be driven by the number of sweeps, but  
443 rather the strength of sweeps a population experiences (Nam et al. 2017). Estimates of selection  
444 strength are generally lacking for the great apes so this relationship remains a question for further  
445 study.

446         In addition to characterizing broad patterns in the genomic landscape for bonobos and  
447 chimpanzees, the results of this study also highlight thousands of candidate regions and genes for  
448 further analysis. We also find additional support for previous selection candidates. For example,

449 disease has been long thought to shape evolution in primates (Nakajima et al. 2008; van der Lee  
450 et al. 2017). The potential for disease transmission between non-human primates and humans has  
451 also prompted much research, particularly focusing on the genomic underpinnings of host  
452 responses to lentiviruses, which include HIV and SIV (Gao et al. 1999; Van Heuverswyn et al.  
453 2006; Compton et al. 2013; Nakano et al. 2020). Cagan and colleagues (2016) found evidence of  
454 recent positive selection within *IDO2*, a T-cell regulatory gene, among all four-chimpanzee  
455 subspecies and bonobos. We identified a candidate soft sweep region for eastern chimpanzees  
456 that overlaps this gene. However, this window had one of the lowest posterior probabilities in  
457 this lineage (49.7%) and there was a nearly equally high probability that this window was linked  
458 to a soft sweep (43.8%). Clearly, additional work is needed to understand the potential role of  
459 *IDO2* in *Pan* evolution. Schmidt et al. (2019) recently described three chemokine receptor  
460 genes—*CCR3*, *CCR9*, and *CXCR6*—had a significant number of highly differentiated SNVs in  
461 central chimpanzees. We could evaluate all three of these genes in our analysis but only one fell  
462 within a candidate sweep window: *CXCR6*. The window containing this gene was confidently  
463 called as a soft sweep with a posterior probability of 85.5%. It is not known as to whether or not  
464 *SIV<sub>cpz</sub>* uses *CXCR6* to enter chimpanzee host cells (Wetzel et al. 2018). However, multiple lines  
465 of evidence for selection either at this locus or within the window overlapping this gene prompt a  
466 closer examination of this genomic region. Finally, *TRIM5* fell within a hard sweep window in  
467 central chimpanzees. *TRIM5* is a well-known retrovirus restriction factor that appears subject to  
468 ancient, multi-episodic positive selection in primates (Sawyer et al. 2005).

469         Recent attention has focused on admixture between lineages in the genus *Pan* and the  
470 potential adaptiveness of introgressed genomic elements. de Manuel and colleagues (2016)  
471 identified 221 genes that fell within putatively introgressed elements in central chimpanzees

472 from admixture with bonobos. Some of this admixture is estimated to occur < 200 Ka, thus  
473 within the timeframe that the present analysis can detect selective sweeps. While we could not  
474 evaluate six of these 221 genes, five fell within candidate sweep regions in central chimpanzees  
475 from our study: *CDK8*, *EIF4E3*, *GRID2*, *PTPRM*, and *TRIM5*. As described above, *TRIM5* was  
476 unique to central chimpanzees. We found *CDK8* in sweep windows for bonobos, eastern  
477 chimpanzees, and Nigeria-Cameroon chimpanzees. In humans, *CDK8* mutations have been  
478 associated with multiple phenotypic effects including hypotonia, behavioral disorders, and facial  
479 dysmorphism (Calpena et al. 2019). We also identified *EIF4E3* in candidate sweeps for bonobos  
480 whereas *GRID2* and *PTPRM* were found in eastern chimpanzees. *EIF4E3* is a translation  
481 initiation factor (Osborne et al. 2013) while *PTPRM* is a member of the protein phosphatase  
482 family (PTP) and has multiple functions including cell proliferation and differentiation (Sun et  
483 al. 2012). *GRID2* generates ionotropic glutamate receptors and mutations have been associated  
484 with abnormalities of the cerebellum (Lalouette et al. 1998).

485         The gene ontology analysis produced only two statistically significant terms, nervous  
486 system development and central nervous system development, for a single *Pan* lineage: central  
487 chimpanzees. While cognitive and neurological differences are widely considered to differentiate  
488 bonobos and chimpanzees (e.g., Rilling et al. 2012; Stimpson et al. 2016; Staes et al. 2019), we  
489 are unaware of any studies that investigate variation among chimpanzee subspecies that may  
490 explain enrichment for nervous system and central nervous system development related genes  
491 specifically in central chimpanzees. We note that compared to other gene ontology analyses, our  
492 level of enrichment is quite low. While we excluded a large number of genes from our analysis  
493 due to poor coverage, our use of a custom background should increase, rather than decrease,  
494 statistical power.

495           The results from our analysis should be interpreted with some caution. First, while our  
496 classifiers achieved a high degree of accuracy, it is possible that some selective sweeps in each  
497 lineage were not detected or regions were incorrectly identified as such (Tables S2 - S5). We  
498 also note that we did not model small selection coefficients ( $s < 0.02$ ) as we could not accurately  
499 classify sweeps under weak selection, which may be the result of the large window size (1.1 Mb)  
500 used here. One consequence may be that if weakly beneficial hard sweeps are present in the  
501 empirical data, they may have been sometimes classified as soft (Harris et al. 2018).  
502 Nonetheless, our classifiers were overall quite good at identifying moderately selected hard and  
503 linked-hard sweeps with both at approximately 95% accuracy across all lineages. Neutral and  
504 linked-soft regions were the most difficult to recognize with neutral regions typically being  
505 classed as soft-linked when they did not appear neutral. This suggests that the neutral portion of  
506 the genome for each lineage is slightly underestimated here. Finally, some moderately selected  
507 soft sweeps were identified as hard sweeps in each of our classifiers, suggesting that some  
508 portion of identified hard sweeps in each lineage are, in fact, soft sweeps. The low false positive  
509 rates demonstrate the overall accuracy of the observed genomic patterns (i.e., the proportion of  
510 hard and soft sweeps) for these taxa. However, this point underscores the need to conduct  
511 subsequent analyses of the candidate regions and genes to confirm such the proposed mode of  
512 adaptation and investigate any functional consequences of that adaptation. In the ‘era of -omics’,  
513 the generation of candidate regions for any type of selection across populations and species  
514 appears to overwhelmingly outpace the confirmation of such patterns. Avenues of research that  
515 investigate these candidate genes in more detail are thus well poised to provide a deeper and  
516 more accurate understanding of lineage-specific adaptations.

517           Second, background selection, the loss of a linked neutral site from purifying selection on  
518 a deleterious allele, can potentially mimic patterns of selective sweeps and thus may impact the  
519 results of this study (Charlesworth et al. 1993). We did not explicitly model background  
520 selection in our analysis, however, evidence from simulations in various taxa demonstrate that  
521 this pattern of selection does not substantially increase the rate of false positives in selective  
522 sweep analyses (Schrider and Kern 2017; Schrider 2020). Further, Nam et al. (2017) considered  
523 the effect of background selection on genomic diversity in extant apes, including all five *Pan*  
524 lineages, and note that background selection alone does not produce the observed diversity  
525 reduction near genic regions in these lineages. While background selection may not largely affect  
526 certain selective sweep analyses, it may impact estimations of demography that are inferred  
527 using PSMC/MSMC approaches (Johri, Riall, et al. 2020; Johri, Charlesworth, et al. 2020). The  
528 demographic strings calculated from PSMC used in this analysis also broadly agree in population  
529 size shape with other demographic estimates generated using other methods (e.g., Becquet and  
530 Przeworski (2007); Hey (2010)), therefore, background selection unlikely affects the  
531 demographic models used in analysis. Yet, this issue should be strongly considered in future  
532 studies where demography is only inferred from PSMC/MSMC.

533           Further, sampling bias can reduce the accuracy of identifying selective sweeps. If  
534 multiple haplotypes are present in a population but only individuals sharing one haplotype are  
535 sampled, then the sweep would be classified as a hard sweep when it is a soft sweep. However,  
536 this scenario would only underestimate the degree of recent adaptation from soft sweeps.  
537 Therefore, if this sampling bias is present in this analysis, then soft sweeps may predominate  
538 recent *Pan* evolution to an even larger degree than described here. Population structure adds  
539 further complications to the classification of hard sweeps. Parallel adaptation produces multi-



540 origin soft sweeps at the global population level that would appear to be hard in local  
541 populations, although even local samples may sometimes appear to be soft sweeps (Ralph and  
542 Coop 2010). Thus, if samples stemmed from one or few local populations then global soft  
543 sweeps may be misclassified as hard. A previous analysis estimated the geographic origin of  
544 individuals used in this analysis (de Manuel et al. 2016). These authors found that individuals  
545 from both eastern and central chimpanzee populations were sampled from multiple countries  
546 across the geographic range for both subspecies. Therefore, any hard sweeps detected in these  
547 populations are likely accurate at the subspecies level. Geographic origin could not be assessed  
548 for any of the bonobos or all of the Nigeria-Cameroon chimpanzees used in this analysis (de  
549 Manuel et al. 2016). As such, sampling or geographic bias may partially explain the high degree  
550 of hard sweeps observed in Nigeria-Cameroon chimpanzees, if they were sampled from a smaller  
551 geographic area than the other subspecies. We encourage future studies to consider this potential  
552 bias when hard sweeps are encountered in existing data and during study design.

553         This analysis focuses on signatures of positive selection at single loci. However, there is  
554 theoretical and empirical evidence that a number of adaptive traits have a complex, multilocus  
555 architecture (Pritchard et al. 2010; Yang et al. 2017; Bergey et al. 2018). For these polygenic  
556 traits, shifts in the physical or social environment might result in allele frequency changes at  
557 many loci, of which, according to models, few to none of which would reach fixation (Pritchard  
558 et al. 2010). This may, in part, explain why hard sweeps appear to be rare in humans and other  
559 species if it represents a dominant mode of adaptation in these taxa. Unfortunately, at this point,  
560 we lack the data and methods to investigate the extent of polygenic selection across the genome  
561 in many non-model taxa such as *Pan*. Another factor to consider is dominance. Here, we  
562 assumed advantageous alleles were codominant, however, there is evidence that dominance may

563 influence patterns of selective sweeps when variants occur via *de novo* mutation or recurrent  
564 mutation (Hartfield and Bataillon 2020). It is also worthwhile to address that this analysis  
565 explicitly focused on modelling very recent completed selective sweeps. Another future avenue  
566 of study in these lineages is the identification of incomplete or partial sweeps using existing  
567 approaches (Ferrer-Admetlla et al. 2014; Vy and Kim 2015) as well as explicitly modelling both  
568 incomplete and complete sweeps to address potential “temporal misclassification” (Zheng and  
569 Wiehe 2019).

570 Finally, while our approach to identifying hard and soft sweeps is a logical first step,  
571 future work should consider sweeps within subspecies to assess population-level (i.e., local),  
572 rather than lineage-specific (i.e., global) adaptations. This is underscored by the extensive  
573 phenotypic variation among chimpanzees, particularly that of behavioral variation, which  
574 includes key characteristics that are often used to dichotomize bonobos and chimpanzees  
575 (Wilson et al. 2014). Further investigation is also clearly warranted in bonobos, whose overall  
576 phenotypic variation is likely underappreciated compared to chimpanzees (Hohmann and Fruth  
577 2003; Sakamaki et al. 2016; Beaune et al. 2017; Wakefield et al. 2019).

578

## 579 **Conclusion**

580 This study highlights the importance of changes in physical and/or social environment via  
581 soft selective sweeps in the recent evolution of our closest living relatives, chimpanzees and  
582 bonobos. Our results also yield further support for the ubiquity of soft, rather than hard, sweeps  
583 in adaptation. We contribute candidate regions and genes that may help identify unique  
584 phenotypes in each *Pan* lineage. Our findings also prompt many new questions including the  
585 estimation of selection strength coefficients and the degree of haplotypic diversity in candidate

586 sweep regions. While our study focuses on these lineages broadly, this point also underscores the  
587 need for high-coverage genomic data collected using non-invasive methods at more local  
588 geographies.

589

## 590 **Acknowledgements**

591 We thank Andy Kern for help with implementing this analysis. Hazel Byrne, Tina Lasisi,  
592 Alan Rogers, Liz Tapanes, and Andrew Zamora provided valuable comments on this manuscript.  
593 We also thank Elisabeth Goldman and Noah Simons for assistance with bioinformatics. We  
594 gratefully acknowledge Brad Sherman (NIH) who provided assistance with our gene ontology  
595 analysis. We thank Mark Allen, Mike Coleman, and Rob Yelle (University of Oregon Research  
596 and Advanced Computing Services) for their help with use of UO's computing cluster—Talapas.  
597 Finally, we thank the Center for High Performance Computing at the University of Utah for  
598 resources and support.

599

## 600 **References**

- 601 Andrews S. 2010. FASTQC. A quality control tool for high throughput sequence data. Available  
602 from: <http://www.bioinformatics.babraham.ac.uk/projects/fastqc>
- 603 Antón SC, Potts R, Aiello LC. 2014. Evolution of early *Homo*: An integrated biological  
604 perspective. *Science* 345:1236828.
- 605 Barratt CD, Lester JD, Gratton P, Onstein RE, Kalan AK, McCarthy MS, Bocksberger G, White  
606 LC, Vigilant L, Dieguez P, et al. 2020. Late Quaternary habitat suitability models for  
607 chimpanzees (*Pan troglodytes*) since the Last Interglacial (120,000 BP). *bioRxiv*  
608 [Internet]. Available from:  
609 <http://biorxiv.org/content/early/2020/05/25/2020.05.15.066662>
- 610 Barrett RDH, Hoekstra HE. 2011. Molecular spandrels: tests of adaptation at the genetic level.  
611 *Nat Rev Genet.* 12:767–780.

- 612 Beaune D, Hohmann G, Serckx A, Sakamaki T, Narat V, Fruth B. 2017. How bonobo  
613 communities deal with tannin rich fruits: Re-ingestion and other feeding processes. *Behav*  
614 *Process.* 142:131–137.
- 615 Becquet C, Przeworski M. 2007. A new approach to estimate parameters of speciation models  
616 with application to apes. *Genome Res.* 17:1505–1519.
- 617 Behringer V, Deschner T, Deimel C, Stevens JMG, Hohmann G. 2014. Age-related changes in  
618 urinary testosterone levels suggest differences in puberty onset and divergent life history  
619 strategies in bonobos and chimpanzees. *Horm Behav.* 66:525–533.
- 620 Benjamini Y, Hochberg Y. 1995. Controlling the false discovery rate: a practical and powerful  
621 approach to multiple testing. *J R Stat Soc Series B Stat Methodol* 57:289–300.
- 622 Bergey CM, Lopez M, Harrison GF, Patin E, Cohen JA, Quintana-Murci L, Barreiro LB, Perry  
623 GH. 2018. Polygenic adaptation and convergent evolution on growth and cardiac genetic  
624 pathways in African and Asian rainforest hunter-gatherers. *Proc Natl Acad Sci USA.*  
625 115:E11256.
- 626 Besenbacher S, Hvilsom C, Marques-Bonet T, Mailund T, Schierup MH. 2019. Direct estimation  
627 of mutations in great apes reconciles phylogenetic dating. *Nat Ecol Evol.* 3:286–292.
- 628 Bradley BJ. 2008. Reconstructing phylogenies and phenotypes: a molecular view of human  
629 evolution. *J Anat.* 212:337–353.
- 630 Broad Institute. 2018. Picard Tools. Available from: <http://broadinstitute.github.io/picard/>
- 631 Cagan A, Theunert C, Laayouni H, Santpere G, Pybus M, Casals F, Prüfer K, Navarro A,  
632 Marques-Bonet T, Bertranpetit J, et al. 2016. Natural selection in the great apes. *Mol Biol*  
633 *Evol.* 33:3268–3283.
- 634 Calpena E, Hervieu A, Kaserer T, Swagemakers SMA, Goos JAC, Popoola O, Ortiz-Ruiz MJ,  
635 Barbaro-Dieber T, Bownass L, Brilstra EH, et al. 2019. De novo missense substitutions in  
636 the gene encoding CDK8, a regulator of the mediator complex, cause a syndromic  
637 developmental disorder. *Am J Hum Genet.* 104:709–720.
- 638 Charlesworth B, Morgan MT, Charlesworth D. 1993. The effect of deleterious mutations on  
639 neutral molecular variation. *Genetics* 134:1289–1303.
- 640 Compton AA, Malik HS, Emerman M. 2013. Host gene evolution traces the evolutionary history  
641 of ancient primate lentiviruses. *Philos Trans R Soc B.* 368:20120496.
- 642 Ewels P, Magnusson M, Lundin S, Käller M. 2016. MultiQC: summarize analysis results for  
643 multiple tools and samples in a single report. *Bioinformatics* 32:3047–3048.
- 644 Ferrer-Admetlla A, Liang M, Korneliussen T, Nielsen R. 2014. On detecting incomplete soft or  
645 hard selective sweeps using haplotype structure. *Mol Biol Evol.* 31:1275–1291.

- 646 Furuichi T. 2011. Female contributions to the peaceful nature of bonobo society. *Ev Anth.*  
647 20:131–142.
- 648 Gao F, Bailes E, Robertson DL, Chen Y, Rodenburg CM, Michael SF, Cummins LB, Arthur LO,  
649 Peeters M, Shaw GM, et al. 1999. Origin of HIV-1 in the chimpanzee *Pan troglodytes*  
650 *troglodytes*. *Nature* 397:436–441.
- 651 Garud NR, Messer PW, Buzbas EO, Petrov DA. 2015. Recent selective sweeps in North  
652 American *Drosophila melanogaster* show signatures of soft sweeps. *PLoS Genet.*  
653 11:e1005004.
- 654 Goodall J. 1986. The chimpanzees of Gombe: Patterns of behavior. Cambridge, MA: Belknap  
655 Press.
- 656 Gossmann TI, Keightley PD, Eyre-Walker A. 2012. The Effect of Variation in the Effective  
657 Population Size on the Rate of Adaptive Molecular Evolution in Eukaryotes. *Genome*  
658 *Biol Evol.* 4:658–667.
- 659 Grüning B, Dale R, Sjödin A, Chapman BA, Rowe J, Tomkins-Tinch CH, Valieris R, Köster J,  
660 The Bioconda Team. 2018. Bioconda: sustainable and comprehensive software  
661 distribution for the life sciences. *Nat Methods* 15:475–476.
- 662 Han S, Andrés AM, Marques-Bonet T, Kuhlwilm M. 2019. Genetic variation in *Pan* species is  
663 shaped by demographic history and harbors lineage-specific functions. *Genome Biol*  
664 *Evol.* 11:1178–1191.
- 665 Harris RB, Sackman A, Jensen JD. 2018. On the unfounded enthusiasm for soft selective sweeps  
666 II: Examining recent evidence from humans, flies, and viruses. *PLoS Genet.*  
667 14:e1007859.
- 668 Hartfield M, Bataillon T. 2020. Selective sweeps under dominance and inbreeding. *G3* 10:1063.
- 669 Henn BM, Cavalli-Sforza LL, Feldman MW. 2012. The great human expansion. *Proc Natl Acad*  
670 *Sci USA.* 109:17758.
- 671 Hermisson J, Pennings PS. 2005. Soft sweeps: Molecular population genetics of adaptation from  
672 standing genetic variation. *Genetics* 169:2335–2352.
- 673 Hermisson J, Pennings PS. 2017. Soft sweeps and beyond: understanding the patterns and  
674 probabilities of selection footprints under rapid adaptation. *Methods Ecol Evol.* 8:700–  
675 716.
- 676 Hernandez RD, Kelley JL, Elyashiv E, Melton SC, Auton A, McVean G, Project 1000 Genomes,  
677 Sella G, Przeworski M. 2011. Classic selective sweeps were rare in recent human  
678 evolution. *Science* 331:920–924.
- 679 Hey J. 2010. The divergence of chimpanzee species and subspecies as revealed in  
680 multipopulation isolation-with-migration analyses. *Mol Biol Evol.* 27:921–933.

- 681 Hohmann G, Fruth B. 2003. Culture in bonobos? Between  $\square$  species and within  $\square$  species variation  
682 in behavior. *Curr Anthropol.* 44:563–571.
- 683 Huang DW, Sherman BT, Lempicki RA. 2008. Bioinformatics enrichment tools: paths toward  
684 the comprehensive functional analysis of large gene lists. *Nucleic Acids Res.* 37:1–13.
- 685 Huang DW, Sherman BT, Lempicki RA. 2009. Systematic and integrative analysis of large gene  
686 lists using DAVID bioinformatics resources. *Nat Protoc.* 4:44–57.
- 687 Jensen JD. 2014. On the unfounded enthusiasm for soft selective sweeps. *Nat Commun.* 5:5281.
- 688 Johri P, Charlesworth B, Jensen JD. 2020. Toward an evolutionarily appropriate null model:  
689 Jointly inferring demography and purifying selection. *Genetics* 215:173.
- 690 Johri P, Riall K, Becher H, Charlesworth B, Jensen JD. 2020. The impact of purifying and  
691 background selection on the inference of population history: problems and prospects.  
692 *bioRxiv*:2020.04.28.066365.
- 693 Kalan AK, Kulik L, Arandjelovic M, Boesch C, Haas F, Dieguez P, Barratt CD, Abwe EE,  
694 Agbor A, Angedakin S, et al. 2020. Environmental variability supports chimpanzee  
695 behavioural diversity. *Nat Commun.* 11:4451.
- 696 Kano T. 1992. The last ape: Pygmy chimpanzee behavior and ecology. Stanford: Stanford  
697 University Press.
- 698 Kern AD, Schrider DR. 2016. Discoal: flexible coalescent simulations with selection.  
699 *Bioinformatics* 32:3839–3841.
- 700 Kern AD, Schrider DR. 2018. diploS/HIC: An updated approach to classifying selective sweeps.  
701 *G3* 8:1959–1970.
- 702 Köster J, Rahmann S. 2012. Snakemake—a scalable bioinformatics workflow engine.  
703 *Bioinformatics* 28:2520–2522.
- 704 Kovalaskas S, Rilling JK, Lindo J. 2020. Comparative analyses of the Pan lineage reveal  
705 selection on gene pathways associated with diet and sociality in bonobos. *Genes Brain*  
706 *Behav.* n/a:e12715.
- 707 Kronenberg ZN, Fiddes IT, Gordon D, Murali S, Cantsilieris S, Meyerson OS, Underwood JG,  
708 Nelson BJ, Chaisson MJP, Dougherty ML, et al. 2018. High-resolution comparative  
709 analysis of great ape genomes. *Science* [Internet] 360. Available from:  
710 <https://science.sciencemag.org/content/360/6393/eaar6343>
- 711 Kuhlwilm M, Han S, Sousa VC, Excoffier L, Marques-Bonet T. 2019. Ancient admixture from  
712 an extinct ape lineage into bonobos. *Nat Ecol Evol.* 3:957–965.
- 713 Lalouette A, Guénet J-L, Vríz S. 1998. Hotfoot mouse mutations affect the  $\delta 2$  glutamate receptor  
714 gene and are allelic to lurcher. *Genomics* 50:9–13.

- 715 Langergraber KE, Prüfer K, Rowney C, Boesch C, Crockford C, Fawcett K, Inoue E, Inoue-  
716 Muruyama M, Mitani JC, Muller MN, et al. 2012. Generation times in wild chimpanzees  
717 and gorillas suggest earlier divergence times in great ape and human evolution. *Proc Natl*  
718 *Acad Sci USA*. 109:15716.
- 719 Lex A, Gehlenborg N, Strobel H, Vuillemot R, Pfister H. 2014. UpSet: Visualization of  
720 intersecting sets. *IEEE Transactions on Visualization and Computer Graphics* 20:1983–  
721 1992.
- 722 Li H. 2011. A statistical framework for SNP calling, mutation discovery, association mapping  
723 and population genetical parameter estimation from sequencing data. *Bioinformatics*  
724 27:2987–2993.
- 725 Li H, unpublished data, <https://arxiv.org/abs/1303.3997>
- 726 Li H, Handsaker B, Wysoker A, Fennell T, Ruan J, Homer N, Marth G, Abecasis G, Durbin R,  
727 1000 Genome Project Data Processing Subgroup. 2009. The sequence alignment/map  
728 format and SAMtools. *Bioinformatics* 25:2078–2079.
- 729 de Manuel M, Kuhlwilm M, Frandsen P, Sousa VC, Desai T, Prado-Martinez J, Hernandez-  
730 Rodriguez J, Dupanloup I, Lao O, Hallast P, et al. 2016. Chimpanzee genomic diversity  
731 reveals ancient admixture with bonobos. *Science* 354:477–481.
- 732 Maynard Smith J, Haigh J. 1974. The hitch-hiking effect of a favourable gene. *Genet Res.* 23:23–  
733 35.
- 734 Messer PW, Petrov DA. 2013. Population genomics of rapid adaptation by soft selective sweeps.  
735 *Trends Ecol Evol.* 28:659–669.
- 736 Mughal MR, DeGiorgio M. 2019. Localizing and classifying adaptive targets with trend filtered  
737 regression. *Mol Biol Evol.* 36:252–270.
- 738 Nakajima T, Ohtani H, Satta Y, Uno Y, Akari H, Ishida T, Kimura A. 2008. Natural selection in  
739 the TLR-related genes in the course of primate evolution. *Immunogenetics* 60:727–735.
- 740 Nakano Y, Yamamoto K, Ueda MT, Soper A, Konno Y, Kimura I, Uriu K, Kumata R, Aso H,  
741 Misawa N, et al. 2020. A role for gorilla APOBEC3G in shaping lentivirus evolution  
742 including transmission to humans. *PLoS Pathog.* 16:e1008812.
- 743 Nam K, Munch K, Mailund T, Nater A, Greminger MP, Krützen M, Marquès-Bonet T, Schierup  
744 MH. 2017. Evidence that the rate of strong selective sweeps increases with population  
745 size in the great apes. *Proc Natl Acad Sci USA*. 114:1613–1618.
- 746 Narasimhan VM, Rahbari R, Scally A, Wuster A, Mason D, Xue Y, Wright J, Trembath RC,  
747 Maher ER, Heel DA van, et al. 2017. Estimating the human mutation rate from  
748 autozygous segments reveals population differences in human mutational processes. *Nat*  
749 *Commun.* 8:1–7.

- 750 Nishida T. 2011. Chimpanzees of the lakeshore: Natural history and culture at Mahale.  
751 Cambridge: Cambridge University Press.
- 752 Nye J, Mondal M, Bertranpetit J, Laayouni H. 2020. A fully integrated machine learning scan of  
753 selection in the chimpanzee genome. *NAR Genom Bioinform.* [Internet] 2. Available  
754 from: <https://doi.org/10.1093/nargab/lqaa061>
- 755 Oleksyk TK, Smith MW, O'Brien SJ. 2010. Genome-wide scans for footprints of natural  
756 selection. *Philos Trans R Soc B.* 365:185–205.
- 757 Osborne MJ, Volpon L, Kornblatt JA, Culjkovic-Kraljacic B, Baguet A, Borden KLB. 2013.  
758 eIF4E3 acts as a tumor suppressor by utilizing an atypical mode of methyl-7-guanosine  
759 cap recognition. *Proc Natl Acad Sci USA.* 110:3877.
- 760 Pedersen BS, Quinlan AR. 2018. Mosdepth: quick coverage calculation for genomes and  
761 exomes. *Bioinformatics* 34:867–868.
- 762 Pennings PS, Hermisson J. 2006a. Soft sweeps II—Molecular population genetics of adaptation  
763 from recurrent mutation or immigration. *Mol Biol Evol.* 23:1076–1084.
- 764 Pennings PS, Hermisson J. 2006b. Soft sweeps III: The signature of positive selection from  
765 recurrent mutation. *PLoS Genet.* 2:e186.
- 766 Poplin R, Ruano-Rubio V, DePristo MA, Fennell TJ, Carneiro MO, Van der Auwera GA, Kling  
767 DE, Gauthier LD, Levy-Moonshine A, Roazen D, et al. 2018. Scaling accurate genetic  
768 variant discovery to tens of thousands of samples. *bioRxiv:201178.*
- 769 Potts R. 1998. Variability selection in hominid evolution. *Ev Anth.* 7:81–96.
- 770 Prado-Martinez J, Sudmant PH, Kidd JM, Li H, Kelley JL, Lorente-Galdos B, Veeramah KR,  
771 Woerner AE, O'Connor TD, Santpere G, et al. 2013. Great ape genetic diversity and  
772 population history. *Nature* 499:471–475.
- 773 Pritchard JK, Pickrell JK, Coop G. 2010. The genetics of human adaptation: Hard sweeps, soft  
774 sweeps, and polygenic adaptation. *Curr Biol.* 20:R208–R215.
- 775 Prüfer K, Munch K, Hellmann I, Akagi K, Miller JR, Walenz B, Koren S, Sutton G, Kodira C,  
776 Winer R, et al. 2012. The bonobo genome compared with the chimpanzee and human  
777 genomes. *Nature* 486:527–531.
- 778 Quinlan AR, Hall IM. 2010. BEDTools: a flexible suite of utilities for comparing genomic  
779 features. *Bioinformatics* 26:841–842.
- 780 R Core Team. 2020. R: A Language and Environment for Statistical Computing. Vienna,  
781 Austria: R Foundation for Statistical Computing Available from: [https://www.R-](https://www.R-project.org/)  
782 [project.org/](https://www.R-project.org/)



- 783 Ralph P, Coop G. 2010. Parallel adaptation: One or many waves of advance of an advantageous  
784 allele? *Genetics* 186:647–668.
- 785 Rilling JK, Scholz J, Preuss TM, Glasser MF, Errangi BK, Behrens TE. 2012. Differences  
786 between chimpanzees and bonobos in neural systems supporting social cognition. *Soc*  
787 *Cogn Affect Neurosci.* 7:369–379.
- 788 Sakamaki T, Maloueki U, Bakaa B, Bongoli L, Kasalevo P, Terada S, Furuichi T. 2016.  
789 Mammals consumed by bonobos (*Pan paniscus*): new data from the Iyondji forest,  
790 Tshuapa, Democratic Republic of the Congo. *Primates* 57:295–301.
- 791 Sarich VM, Wilson AC. 1967. Immunological time scale for hominid evolution. *Science*  
792 158:1200.
- 793 Sawyer SL, Wu LI, Emerman M, Malik HS. 2005. Positive selection of primate *TRIM5a*  
794 identifies a critical species-specific retroviral restriction domain. *Proc Natl Acad Sci*  
795 *USA.* 102:2832.
- 796 Scally A, Dutheil JY, Hillier LW, Jordan GE, Goodhead I, Herrero J, Hobolth A, Lappalainen T,  
797 Mailund T, Marques-Bonet T, et al. 2012. Insights into hominid evolution from the  
798 gorilla genome sequence. *Nature* 483:169–175.
- 799 Schiffels S, Durbin R. 2014. Inferring human population size and separation history from  
800 multiple genome sequences. *Nat Genet.* 46:919–925.
- 801 Schmidt JM, Manuel M de, Marques-Bonet T, Castellano S, Andrés AM. 2019. The impact of  
802 genetic adaptation on chimpanzee subspecies differentiation. *PLoS Genet.* 15:e1008485.
- 803 Schrider DR. 2020. Background selection does not mimic the patterns of genetic diversity  
804 produced by selective sweeps. *Genetics* 216:499–519.
- 805 Schrider DR, Kern AD. 2017. Soft sweeps are the dominant mode of adaptation in the human  
806 genome. *Mol Biol Evol.* 34:1863–1877.
- 807 Schrider DR, Mendes FK, Hahn MW, Kern AD. 2015. Soft shoulders ahead: Spurious signatures  
808 of soft and partial selective sweeps result from linked hard sweeps. *Genetics* 200:267–  
809 284.
- 810 Staes N, Smaers JB, Kunkle AE, Hopkins WD, Bradley BJ, Sherwood CC. 2019. Evolutionary  
811 divergence of neuroanatomical organization and related genes in chimpanzees and  
812 bonobos. *Cortex* 118:154–164.
- 813 Stevison LS, Woerner AE, Kidd JM, Kelley JL, Veeramah KR, McManus KF, Great Ape  
814 Genome Project, Bustamante CD, Hammer MF, Wall JD. 2015. The time scale of  
815 recombination rate evolution in great apes. *Mol Biol Evol.* 33:928–945.

- 816 Stimpson CD, Barger N, Taglialatela JP, Gendron-Fitzpatrick A, Hof PR, Hopkins WD,  
817 Sherwood CC. 2016. Differential serotonergic innervation of the amygdala in bonobos  
818 and chimpanzees. *Soc Cogn Affect Neurosci*. 11:413–422.
- 819 Stumpf RM. 2011. Chimpanzees and bonobos: Inter- and intraspecies diversity. In: Campbell CJ,  
820 Fuentes A, MacKinnon KC, Bearder SK, Stumpf RM, editors. *Primates in perspective*.  
821 New York: Oxford University Press. p. 340–356.
- 822 Sun P-H, Ye L, Mason MD, Jiang WG. 2012. Protein tyrosine phosphatase  $\mu$  (PTP  $\mu$  or  
823 PTPRM), a negative regulator of proliferation and invasion of breast cancer cells, is  
824 associated with disease prognosis. *PLOS ONE* 7:e50183.
- 825 Susman RL ed. 1984. *The pygmy chimpanzee: Evolutionary biology and behavior*. New York:  
826 Springer.
- 827 Takemoto H, Kawamoto Y, Higuchi S, Makinose E, Hart JA, Hart TB, Sakamaki T, Tokuyama  
828 N, Reinartz GE, Guislain P, et al. 2017. The mitochondrial ancestor of bonobos and the  
829 origin of their major haplogroups. *PLOS ONE* 12:e0174851.
- 830 Turley K, Frost SR. 2014. The appositional articular morphology of the talo-crural joint: The  
831 influence of substrate use on joint shape. *Anat Rec*. 297:618–629.
- 832 Van Heuverswyn F, Li Y, Neel C, Bailes E, Keele BF, Liu W, Loul S, Butel C, Liegeois F,  
833 Bienvenue Y, et al. 2006. SIV infection in wild gorillas. *Nature* 444:164–164.
- 834 van der Lee R, Wiel L, van Dam TJP, Huynen MA. 2017. Genome-scale detection of positive  
835 selection in nine primates predicts human-virus evolutionary conflicts. *Nucleic Acids Res*.  
836 45:10634–10648.
- 837 Vy HMT, Kim Y. 2015. A composite-likelihood method for detecting incomplete selective  
838 sweep from population genomic data. *Genetics* 200:633.
- 839 Wakefield ML, Hickmott AJ, Brand CM, Takaoka IY, Meador LM, Waller MT, White FJ. 2019.  
840 New observations of meat eating and sharing in wild bonobos (*Pan paniscus*) at Iyema,  
841 Lomako Forest Reserve, Democratic Republic of the Congo. *Fol Primatol*. 90:179–189.
- 842 Webster TH, Couse M, Grande BM, Karlins E, Phung TN, Richmond PA, Whitford W, Wilson  
843 MA. 2019. Identifying, understanding, and correcting technical artifacts on the sex  
844 chromosomes in next-generation sequencing data. *Gigascience* [Internet] 8. Available  
845 from: <https://academic.oup.com/gigascience/article/8/7/giz074/5530326>
- 846 Webster TH, Wilson Sayres MA. 2016. Genomic signatures of sex-biased demography: progress  
847 and prospects. *Curr Opin Genet*. 41:62–71.
- 848 Wegmann D, Excoffier L. 2010. Bayesian inference of the demographic history of chimpanzees.  
849 *Mol Biol Evol*. 27:1425–1435.

- 850 Wetzell KS, Yi Y, Yadav A, Bauer AM, Bello EA, Romero DC, Bibollet-Ruche F, Hahn BH,  
851 Paiardini M, Silvestri G, et al. 2018. Loss of CXCR6 coreceptor usage characterizes  
852 pathogenic lentiviruses. *PLoS Pathog.* 14:e1007003.
- 853 White FJ. 1996. *Pan paniscus* 1973 to 1996: Twenty-three years of field research. *Ev Anth.*  
854 5:11–17.
- 855 Wickham H. 2016. *ggplot2: Elegant Graphics for Data Analysis*. New York: Springer-Verlag  
856 Available from: <https://ggplot2.tidyverse.org>
- 857 Wilson BA, Petrov DA, Messer PW. 2014. Soft selective sweeps in complex demographic  
858 scenarios. *Genetics* 198:669.
- 859 Wilson ML, Boesch C, Fruth B, Furuichi T, Gilby IC, Hashimoto C, Hobaiter CL, Hohmann G,  
860 Itoh N, Koops K, et al. 2014. Lethal aggression in *Pan* is better explained by adaptive  
861 strategies than human impacts. *Nature* 513:414–417.
- 862 Wrangham RW. 1986. Ecology and social relationships in two species of chimpanzee. In:  
863 Rubenstein DI, Wrangham RW, editors. *Ecological aspects of social evolution: Birds and*  
864 *mammals*. Princeton, NJ: Princeton University Press. p. 352–378.
- 865 Yang J, Jin Z-B, Chen J, Huang X-F, Li X-M, Liang Y-B, Mao J-Y, Chen X, Zheng Z, Bakshi  
866 A, et al. 2017. Genetic signatures of high-altitude adaptation in Tibetans. *Proc Natl Acad*  
867 *Sci USA.* 114:4189.
- 868 Zheng Y, Wiehe T. 2019. Adaptation in structured populations and fuzzy boundaries between  
869 hard and soft sweeps. *PLoS Comput Biol.* 15:e1007426.
- 870
- 871

872 Table 1. Selective sweep summary per population.

| Lineage                     | Number / Percent of Windows per Class Type |                  |                  |                   |                 |        | Number and Percent of Sweep Type |                  |       |
|-----------------------------|--------------------------------------------|------------------|------------------|-------------------|-----------------|--------|----------------------------------|------------------|-------|
|                             | Hard                                       | Linked-<br>hard  | Neutral          | Linked-<br>soft   | Soft            | Total  | Hard                             | Soft             | Total |
| <i>P. paniscus</i>          | 85<br>(0.4%)                               | 1,576<br>(6.5%)  | 7,488<br>(30.8%) | 13,168<br>(54.1%) | 2,002<br>(8.2%) | 24,319 | 81<br>(4.9%)                     | 1,585<br>(95.1%) | 1,666 |
| <i>P. t. ellioti</i>        | 573<br>(2.4%)                              | 6,358<br>(26.1%) | 1,389<br>(5.7%)  | 14,498<br>(59.6%) | 1,505<br>(6.2%) | 24,323 | 488<br>(26.9%)                   | 1,323<br>(73.1%) | 1,811 |
| <i>P. t. schweinfurthii</i> | 32<br>(0.1%)                               | 696<br>(2.9%)    | 1,835<br>(7.5%)  | 20,179<br>(83.0%) | 1,581<br>(6.5%) | 24,323 | 32<br>(2.3%)                     | 1,376<br>(97.7%) | 1,408 |
| <i>P. t. troglodytes</i>    | 224<br>(0.9%)                              | 1,746<br>(7.2%)  | 5,483<br>(22.5%) | 15,121<br>(62.2%) | 1,749<br>(7.2%) | 24,323 | 184<br>(10.6%)                   | 1,557<br>(89.4%) | 1,741 |

873

874

875 Figure 1. Unique and shared hard sweep windows. The frequency of windows shared by two or  
876 more lineages should be considered relative to the total possible number of shared windows (i.e.,  
877 the set size of the lineage with the smallest set size).

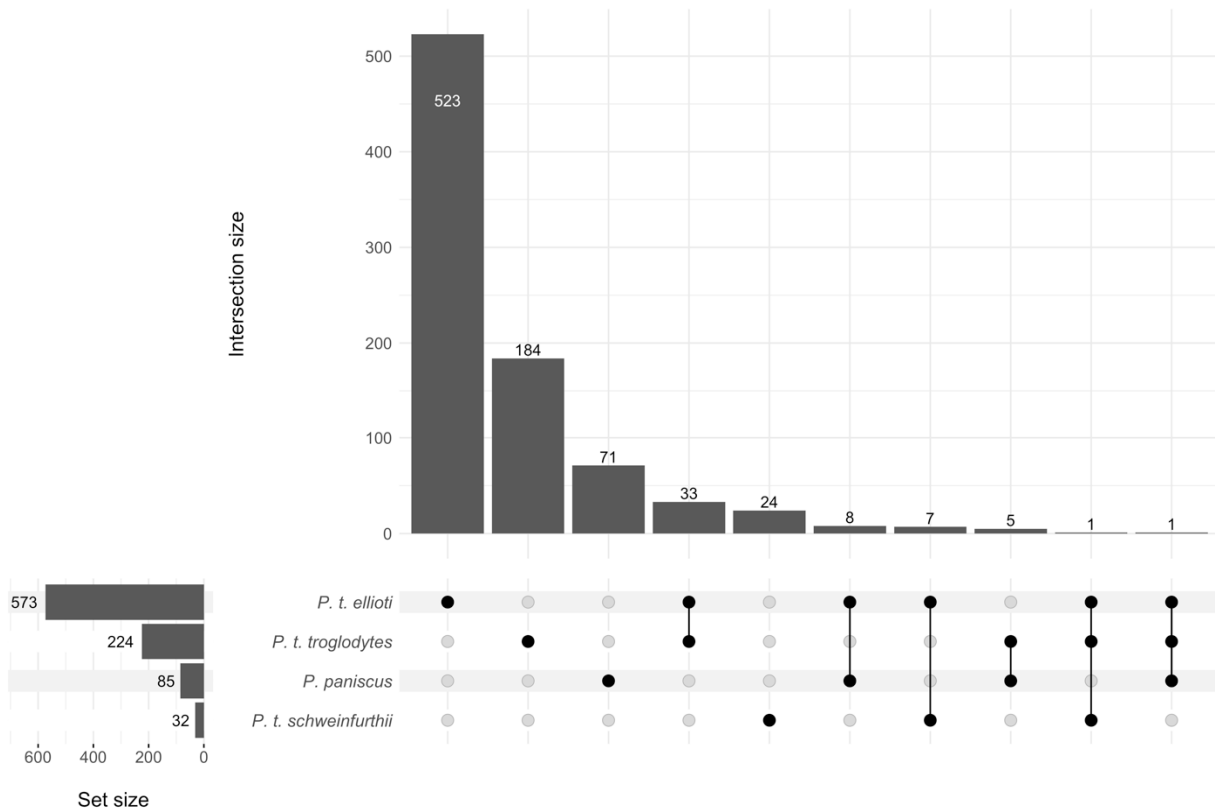

878

879 Figure 2. Unique and shared soft sweep windows. The frequency of windows shared by two or  
 880 more lineages should be considered relative to the total possible number of shared windows (i.e.,  
 881 the set size of the lineage with the smallest set size).

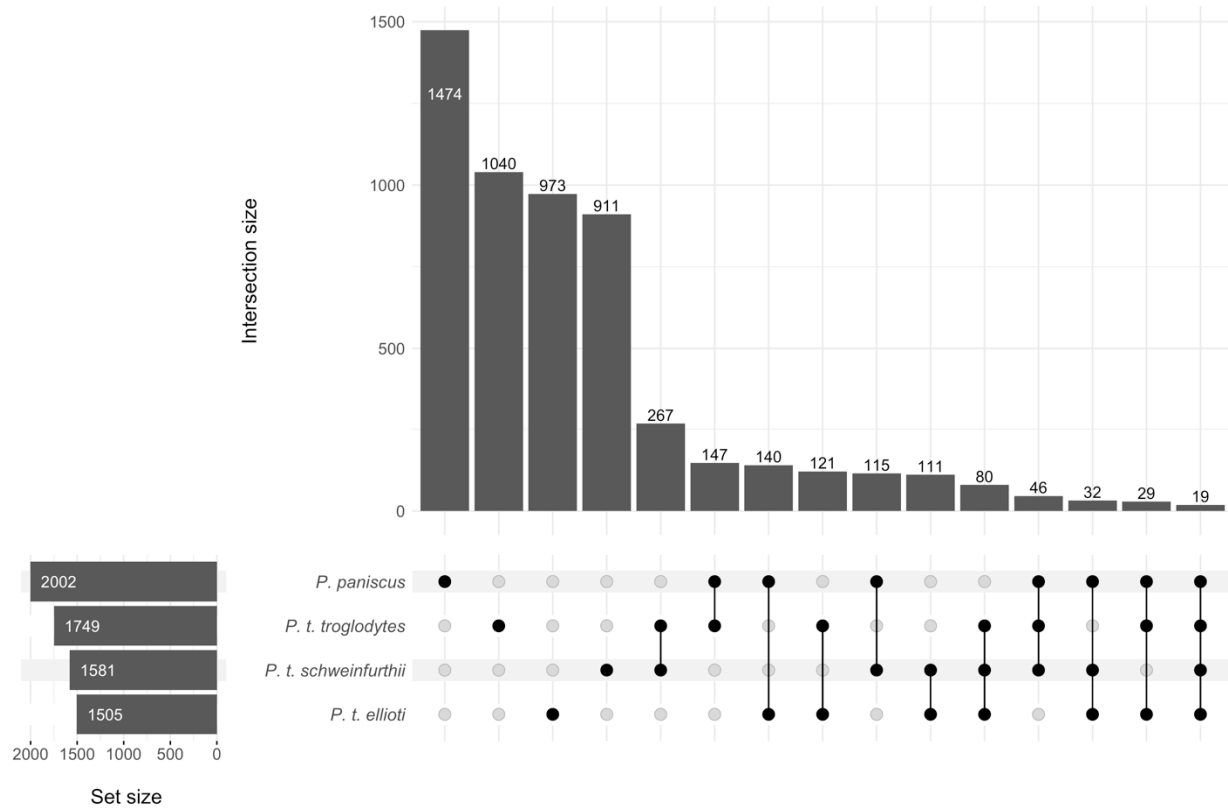

882

883

884 Supplements.

- 885 • Main Supplemental File: Figures S1 - S3, Tables S1-S4.
- 886 • File S1. Sample information. (File name: File\_S1\_sample\_information.xlsx)
- 887 • File S2. Genome accessibility information. (File name:  
888 File\_S2\_genome\_accessibility.xlsx)
- 889 • File S3. Discoal parameter information. (File name:  
890 File\_S3\_discoal\_input\_summary.xlsx)
- 891 • File S4. Classifier trial information. (File name:  
892 File\_S4\_diploshic\_classifier\_summary.xlsx)
- 893 • File S5. Unmasked SNV count/fraction per window for VCF feature vectors. (File name:  
894 File\_S5\_fvec\_vcf\_unmaskedsnpcount\_unmaskedfrac\_summary)
- 895 • File S6. Number of hard and soft sweep windows using higher probability thresholds.  
896 (File name: File\_S6\_sweeptype\_probability\_cutoff\_summary.xlsx)
- 897 • File S7. Genes included in sweep analysis (File name: File\_S7\_genes\_to\_include.xlsx)
- 898 • File S8. Sweep information. (File name: File\_S8\_selective\_sweep\_summary.xlsx)
- 899 • File S9. List of genes in hard and soft sweeps. (File name: File\_S9\_gene\_lists.xlsx)
- 900 • File S10. Gene ontology analysis. (File name: File\_S10\_gene\_ontology.xlsx)
